# Supplementary material for: Mapping the functional interactions at the tumor-immune checkpoint interface
Source: PubMed Central journal article supplement (PMC10140040; doi:10.1038/s42003-023-04777-3), 2023-04-27
Supplement: 42003_2023_4777_MOESM2_ESM.pdf [file 42003_2023_4777_MOESM2_ESM.pdf]

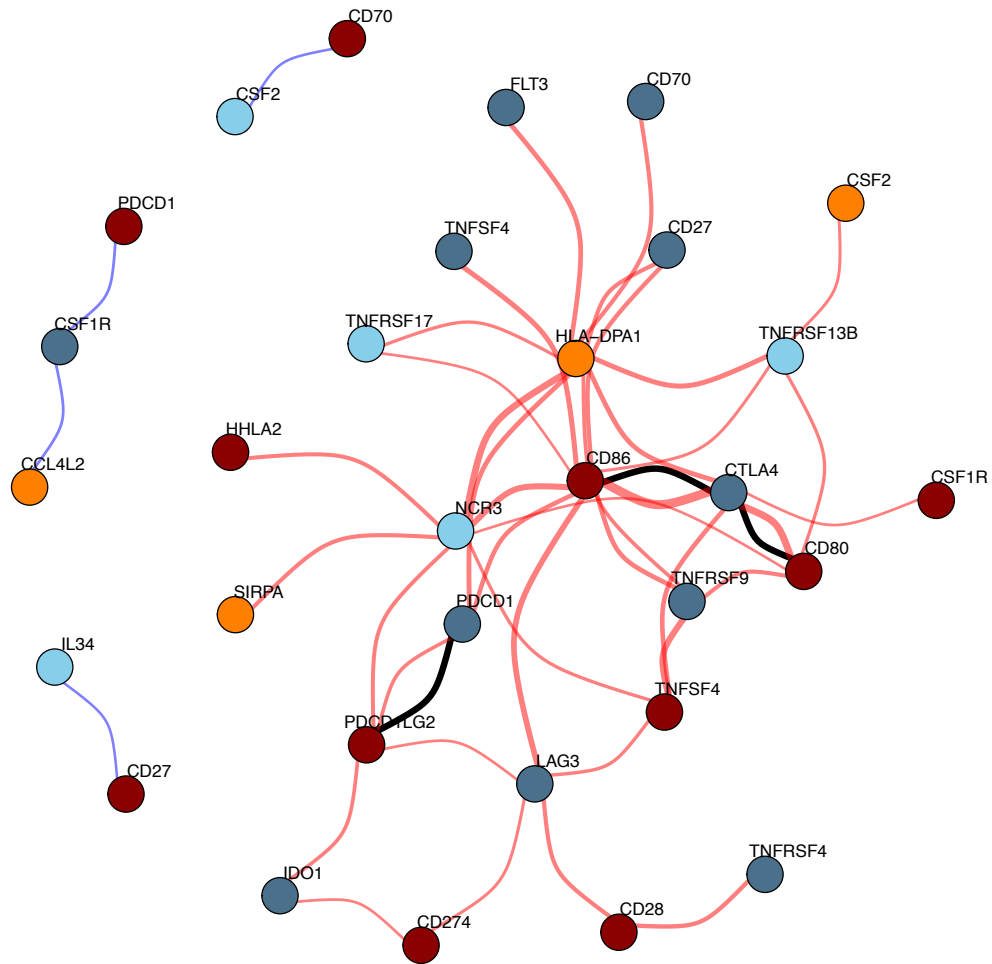

**Supplementary Figure 1.** A Sample graphical network depicting receptor ligand pairs from CellphoneDB as black edges. Red/Blue edges depict combined action scores of immune checkpoints and their corresponding ligand/receptors on fraction of M2 macrophages (IAP) in TCGA LUAD samples (576 samples). The receptor ligand pairs which are also inferred as adjacent vertices, namely PDCD1 and PDCD1L2, CTLA4 and CD80, CTLA4 and CD86, are represented with black edges.





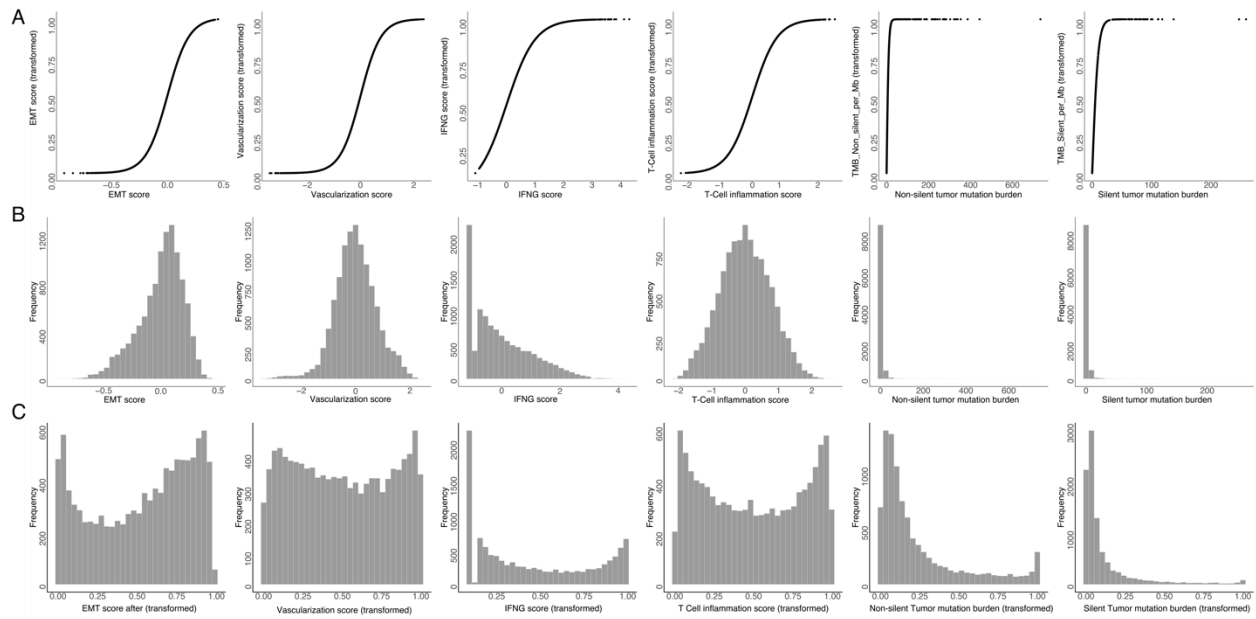

**Supplementary Figure 4.** a) Graphs of IAP transformation functions. b) Distribution of IAP values in PanCan TCGA data. c) Corresponding distribution histogram of transformed IAP through execution of equation 1. Note that Leukocyte fraction and fractions of immune cell types do not change under transformation, as they are inherently positive and smaller than 1.

## Supplementary Tables

**Supplementary Table 1.** Immune checkpoints and their ligands or receptors.

| Gene name | Protein name | Potential interactions |
|-----------|--------------|------------------------|
| PDCD1     | PD-1         | PD-L1, PDL2            |
| CD274     | PD-L1        | PD-1                   |
| CTLA4     | CTLA-4       | CD28, B7-1, B7-2       |
| CSF1R     | CSF1R        | CSF1                   |
| TNFRSF9   | 4-1BB        | 4-1BBL                 |
| TNFRSF18  | GITR         | GITRL                  |
| CD27      | CD27         | CD70                   |
| ICOS      | ICOS         | B7-h2                  |
| TNFRSF4   | OX40         | OX40LG                 |
| PDCD1LG2  | PD-L2        | PD-1                   |
| CD70      | CD70         | CD27                   |
| CSF1      | CSF1         | CSF1R                  |
| TNFSF9    | 4-1BBL       | 4-1BB                  |
| TNFSF4    | OX40LG       | OX40                   |
| TNFSF18   | GITRL        | GITR                   |
| CD28      | CD28         | CTLA-4                 |
| CD80      | B7-1         | CTLA-4                 |
| CD86      | B7-2         | CTLA-4                 |
| ICOSLG    | B7-h2        | ICOS                   |
| CD276     | B7-h3        |                        |
| VTCN1     | B7-h4        |                        |
| VSIR      | B7-h5        |                        |
| NCR3LG1   | B7-h6        |                        |
| HHLA2     | B7-h7        |                        |

|      |       |  |
|------|-------|--|
| LAG3 | LAG-3 |  |
| IDO1 | IDO1  |  |
| FLT3 | FLT3  |  |
| NT5E | CD73  |  |
| TLR3 | TLR-3 |  |

**Supplementary Table 2.** ImogiMap's default immune-associated phenotypes

| <b>Phenotype</b>                        | <b>Source</b>                                                           |
|-----------------------------------------|-------------------------------------------------------------------------|
| EMT score                               | mRNA expression of EMT signature genes (Mak et al., 2016)               |
| Vascularization                         | mRNA expression of Angiogenesis signature genes (Masiero et al., 2013)  |
| T cell Inflammation                     | mRNA expression of T cell inflamed signature genes (Ayers et al., 2017) |
| IFNG score                              | mRNA expression of <i>IFNG</i> (Gao et al., 2016)                       |
| Non-silent tumor mutation burden per MB | Whole exome or genome sequencing (Hoadley et al. 2018)                  |
| Silent tumor mutation burden per MB     | Whole exome or genome sequencing (Hoadley et al. 2018)                  |
| Leukocyte fraction                      | DNA methylation (Hoadley et al. 2018)                                   |
| 22 immune cell type fractions           | CIBERSORT analysis of mRNA expression (Thorsson et al. 2018)            |

**Supplementary Table 3.** 22 immune cell types from CIBERSORT analysis

|                                |
|--------------------------------|
| Memory B Cells                 |
| Naive B Cells                  |
| Plasma Cells                   |
| CD8 T cells                    |
| Naive CD4 T cells              |
| Activated memory CD4 T cells   |
| Resting Memory CD4 T cells     |
| Follicular Helper T Cells      |
| Regulatory T Cells             |
| Gamma Delta T Cells            |
| Activated Natural killer Cells |
| Resting Natural Killer Cells   |
| Monocytes                      |
| M0 Macrophages                 |
| M1 Macrophages                 |
| M2 Macrophages                 |
| Resting Dendritic Cells        |
| Activated Dendritic Cells      |
| Activated Mast Cells           |
| Resting Mast Cells             |
| Eosinophils                    |
| Neutrophils                    |



**Supplementary Table 4.** T-cell dysfunction signature genes for UCEC (Jiang et al., 2018)

|          |
|----------|
| AMPD3    |
| ANKRD27  |
| ANKRD29  |
| ARID3B   |
| CD5      |
| COQ10A   |
| ELMO1    |
| FAM65B   |
| GBP6     |
| GUCA1A   |
| HLA-G    |
| ITPRIPL2 |
| KCNA5    |
| KHNYN    |
| MTMR2    |
| NAV2     |
| NDST3    |
| NDST4    |
| NFATC3   |
| NLRC5    |
| NR3C2    |
| PEX13    |
| PLD6     |
| SERPINB9 |
| SFN      |
| XCL1     |

**Supplementary Table 5.** List of T-cell dysfunction signature genes for TNBC (Jiang et al., 2018)

|           |
|-----------|
| ARID3B    |
| SCAMP5    |
| ARRDC5    |
| NPAS1     |
| VPS39     |
| ACTL6B    |
| KCNA5     |
| MAST3     |
| ARHGEF18  |
| LCNL1     |
| VAMP2     |
| RBCK1     |
| TYK2      |
| TTY13     |
| PLA2G4B   |
| MAN2C1    |
| LOC285095 |
| RINL      |
| CYFIP2    |
| ASAH2     |
| PLCH2     |
| MAL       |
| COQ10A    |
| PSMD9     |
| PANK4     |
| HDC       |
| KDEL3     |
| ROPN1B    |
| ME2       |
| HDAC2     |
| HAO1      |
| SAMD8     |

|          |
|----------|
| ROPN1    |
| ILF2     |
| DEFA1B   |
| SESTD1   |
| AMD 1.00 |
| PHYH     |
| JRKL     |
| PAPSS1   |
| USP6NL   |
| PLA2G4A  |
| DOCK7    |
| ELF5     |

**Supplementary Table 6.** Ligand-receptor pairs for ICP and T-cell dysfunction genes based on CellPhoneDB database.

| Gene1     | Gene2    |
|-----------|----------|
| CD27      | CD70     |
| PDCD1     | CD274    |
| PDCD1     | PDCD1LG2 |
| CD80      | CD274    |
| CD28      | CD80     |
| CD28      | CD86     |
| CTLA4     | CD80     |
| CTLA4     | CD86     |
| CTLA4     | CD28     |
| CSF1R     | CSF1     |
| CSF1R     | IL34     |
| CSF1R     | CSF3     |
| CSF1      | SLC7A1   |
| CSF1      | SIRPA    |
| CSF1      | CELSR3   |
| CSF2      | CSF1R    |
| NCR3      | NCR3LG1  |
| FLT3      | FLT3LG   |
| ICOSLG    | ICOS     |
| TNFSF18   | TNFRSF18 |
| TNFSF4    | TNFRSF4  |
| TNFSF9    | TNFRSF9  |
| BMP10     | VSIR     |
| CCL4L2    | VSIR     |
| TNF       | VSIR     |
| TNFRSF13B | CD70     |
| CD70      | TNFRSF17 |
| CD70      | GPRC5B   |
| TNF       | ICOS     |
| PDCD1     | FAM3C    |

|          |         |
|----------|---------|
| KLRG2    | TNFSF9  |
| HLA-DPA1 | TNFSF9  |
| PVR      | TNFSF9  |
| TNFSF9   | IL13RA2 |
| TNFSF9   | ADGRG5  |
| HLA-G    | LILRB2  |
| XCL1     | XCR1    |
| XCL1     | ADGRV1  |

**Supplementary Table 7.** Partial (spearman) correlation values of CD86 and CD70 with immune cell types in UCEC patients. For each gene-immune cell type pairwise partial correlation is calculated in the presence of other immune cell types.

| gene | Immune cell types            | Partial correlation | Pvalue(FDR adjusted) |
|------|------------------------------|---------------------|----------------------|
| CD86 | Macrophages.M2               | 0.272               | 6.97e-06             |
| CD86 | Macrophages.M1               | 0.215               | 1.34e-03             |
| CD86 | T.Cells.Regulatory.Tregs     | 0.215               | 1.36e-03             |
| CD86 | T.Cells.CD4.Memory.Activated | 0.200               | 4.51e-03             |

| gene | Immune cell types        | Partial correlation | Pvalue (FDR-adjusted) |
|------|--------------------------|---------------------|-----------------------|
| CD70 | T.Cells.CD8              | 0.189               | 9.76e-03              |
| CD70 | T.Cells.Regulatory.Tregs | 0.172               | 3.17e-02              |

**Supplementary Table 8.** Partial (spearman) correlation values of CD70 and CD274 in TNBC patients. For each gene-immune cell type pairwise partial correlation is calculated given other immune cell types.

| gene  | Immune cell types            | Partial correlation | Pvalue(FDR adjusted) |
|-------|------------------------------|---------------------|----------------------|
| CD274 | T.Cells.CD4.Memory.Activated | 0.477               | 1.61e-08             |
| CD274 | Macrophages.M1               | 0.431               | 8.33e-07             |
| CD274 | T.Cells.CD4.Memory.Resting   | 0.326               | 9.88e-04             |
| CD274 | Neutrophils                  | 0.244               | 6.06e-02             |

| gene | Immune cell types            | Partial correlation | Pvalue (FDR-adjusted) |
|------|------------------------------|---------------------|-----------------------|
| CD70 | T.Cells.CD4.Memory.Activated | 0.289               | 7.90e-3               |
| CD70 | T.Cells.Regulatory.Tregs     | 0.239               | 7.54e-2               |
